# Supplementary material
Source: PubMed Central journal article supplement (PMC2933306)

**Supplementary Material:**

**Figure S1. No SDS-table complex formation between HP8<sub>Xa</sub> and serpin-4 or serpin-5.** ProHP8<sub>Xa</sub> (50 ng) was activated by factor Xa and then incubated for 10 min at room temperature with a 10-fold molar excess of serpin-4 or serpin-5. In control reactions, proHP8<sub>Xa</sub> or factor Xa were omitted. The samples were subjected to SDS-PAGE and immunoblot analysis using antiserium against HP8 or serpin indicted on the *top*. HP8 antibody recognized the 42 kDa proHP8<sub>Xa</sub> zymogen, a 34 kDa catalytic domain produced upon activation, and an inactive, truncated proHP8<sub>Xa</sub> that is present in the preparation (An et al., 2010). Size and positions of molecular mass standards are indicated to the *left* of each blot.

Fig. S1

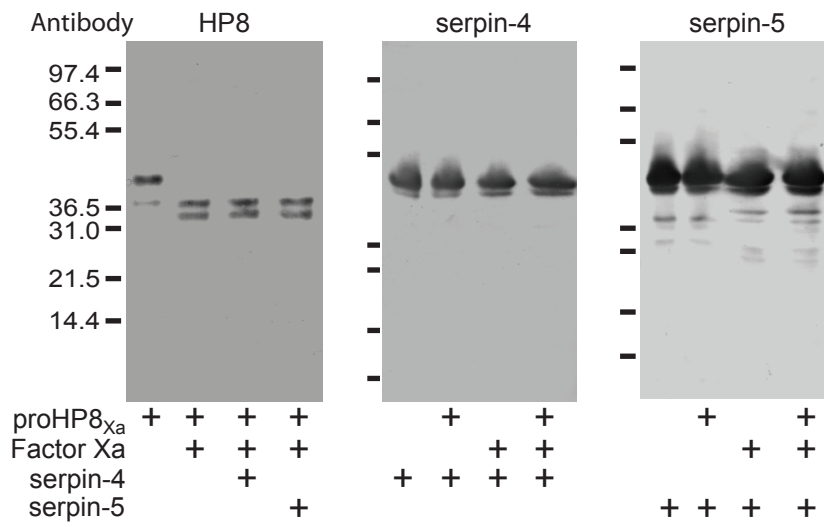

Supplement: NIHMS222494-supplement-01.pdf [file NIHMS222494-supplement-01.pdf]
